# Supplementary material
Source: Springer Nature journal article supplement (https://www.springermedizin.de/resource/supplementary/12885_2012_3622_MOESM3_ESM.pdf/9465062)
Supplement: MOESM3 [file 9465062]

1. Tumors expressing HERV-K

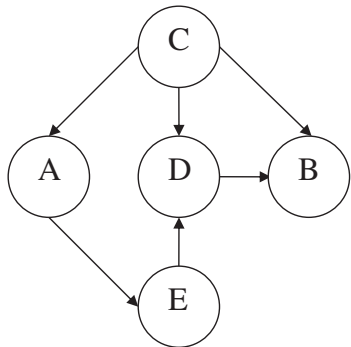

2. Tumors not expressing HERV-K

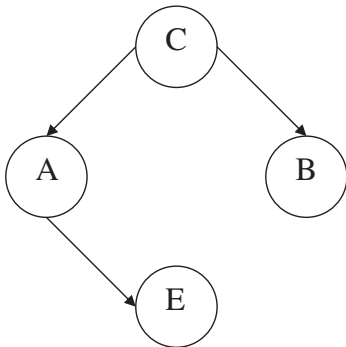

Symbols: “A” = cause (YFV); “B” = outcome (cancer); “C” = confounders (recreational solar exposure and high social class); “D” and “E” = mediators (HERV-K antigen and immune response).
